# Supplementary material
Source: PubMed Central journal article supplement (PMC3264290)
Supplement: supp_80.2.753_IAI6101-11_SF1-SF8.pdf [file supp_80.2.753_IAI6101-11_SF1-SF8.pdf]

# Suppl. Fig 1

←  $-1^0$  Ab →

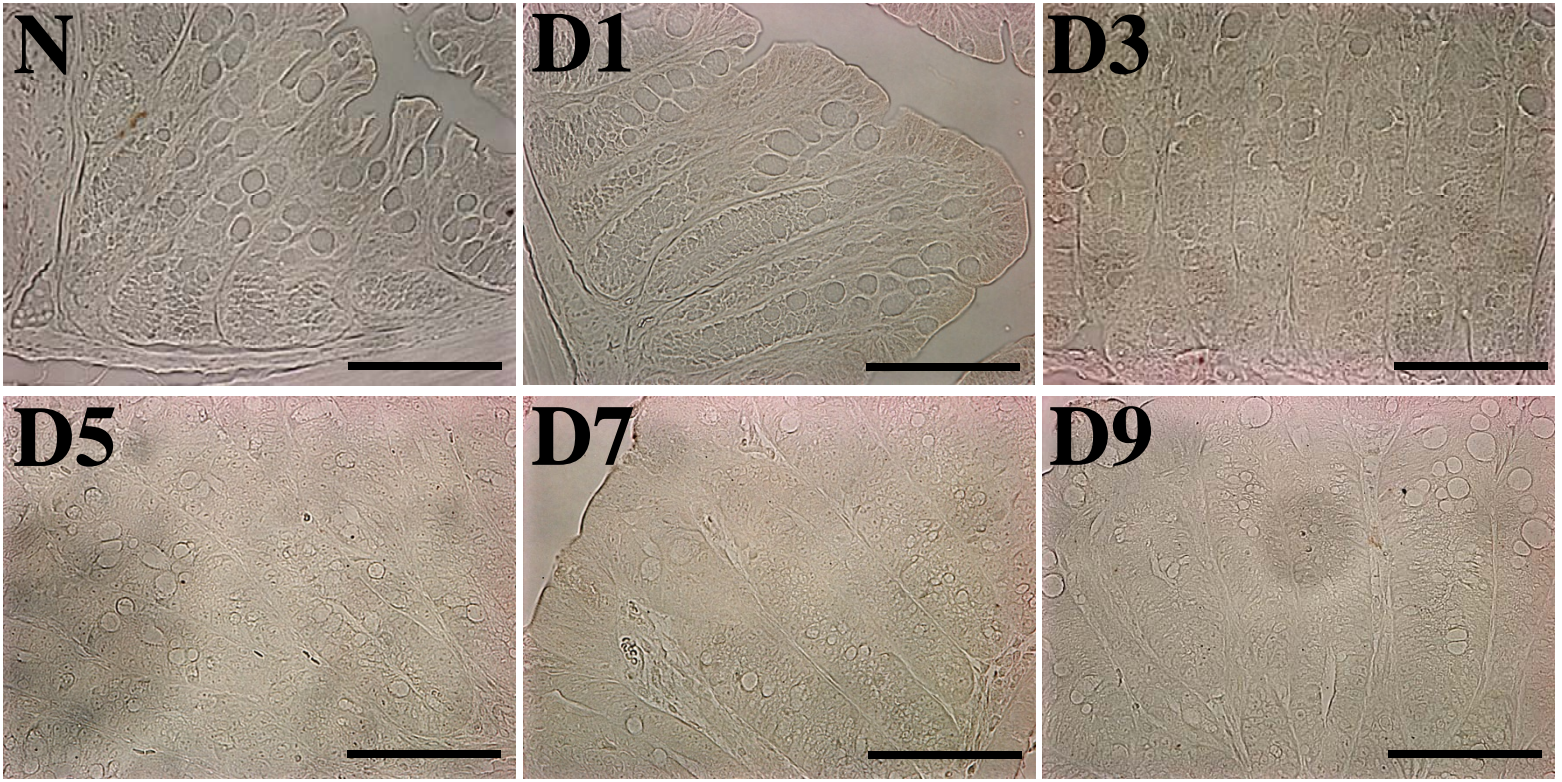

← Rabbit IgG →

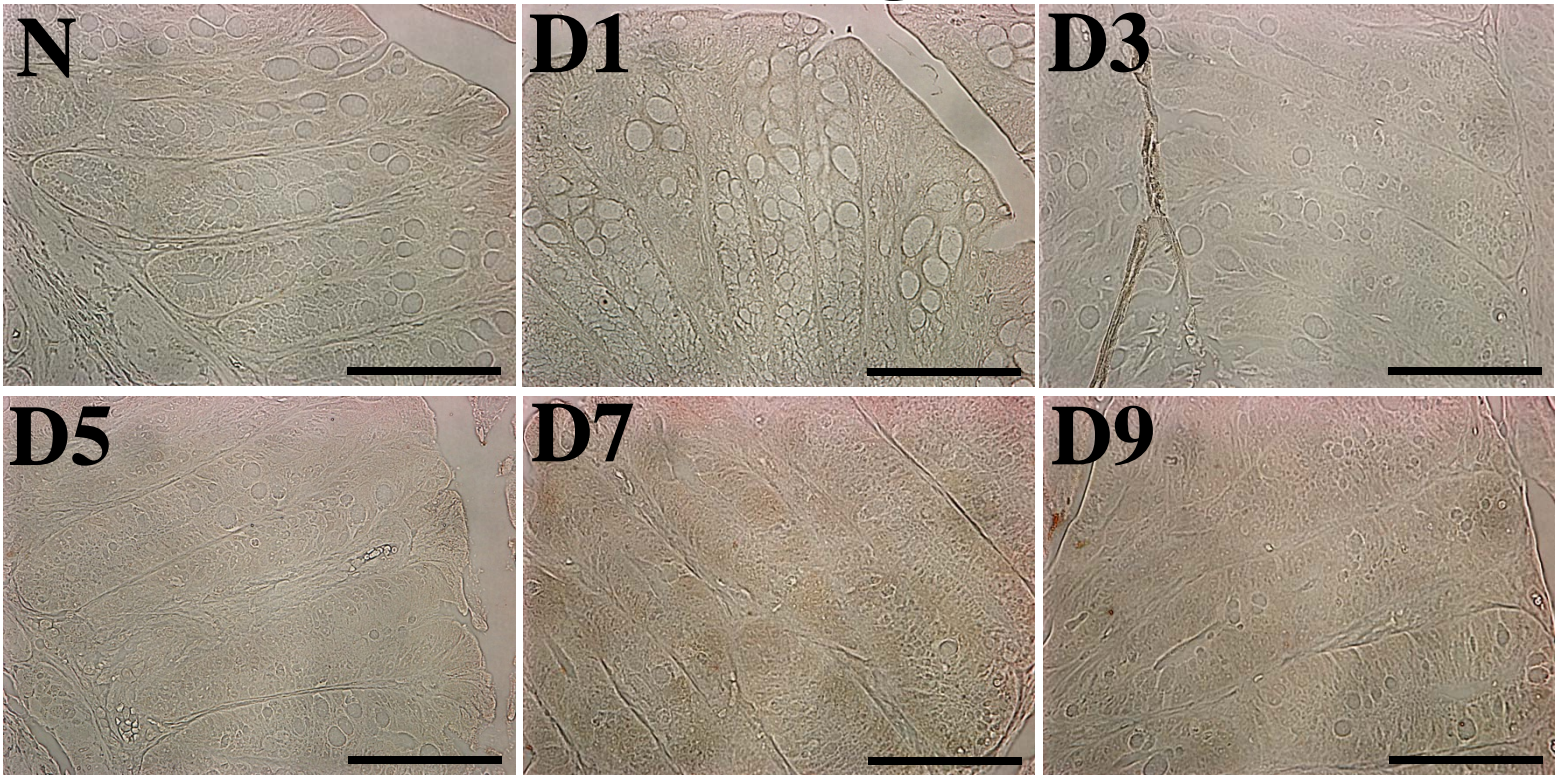



# Suppl. Fig 2

←  $pp65^{276}$  →

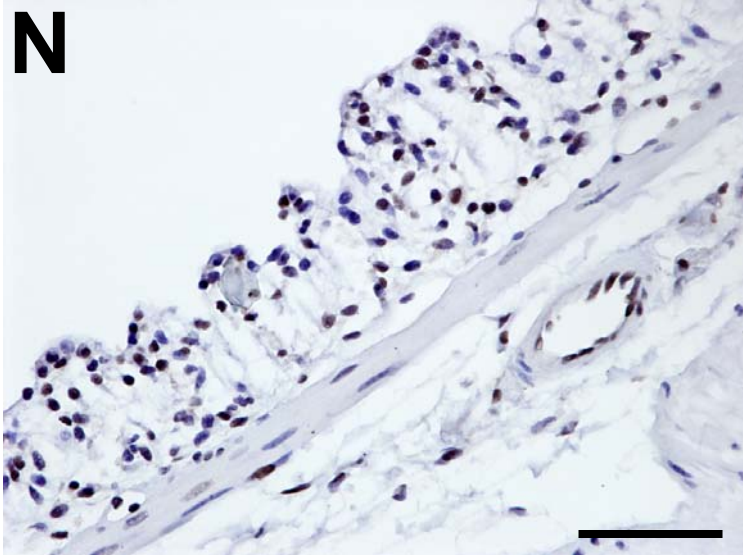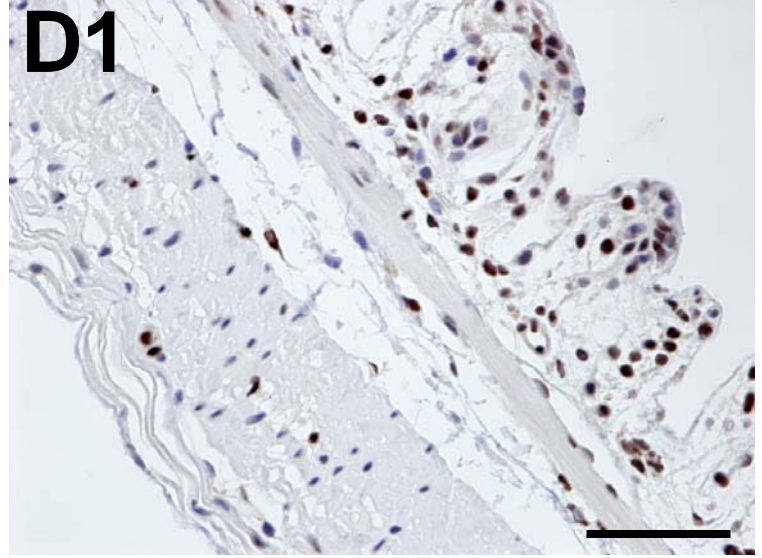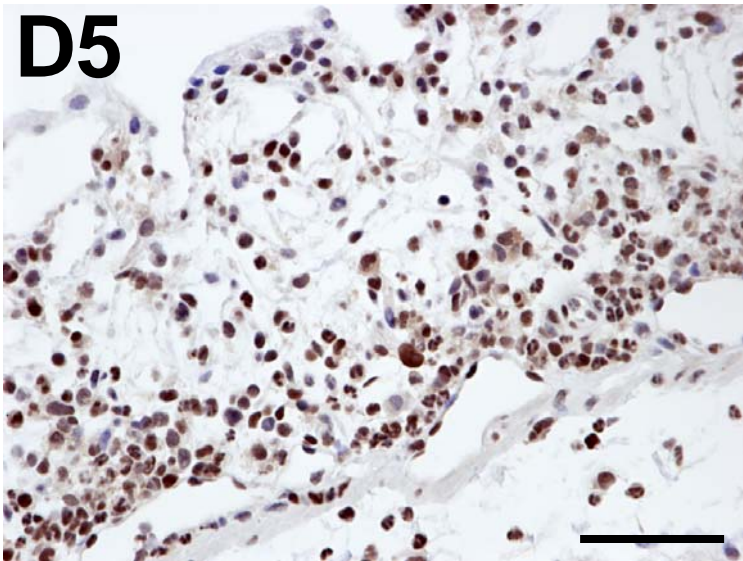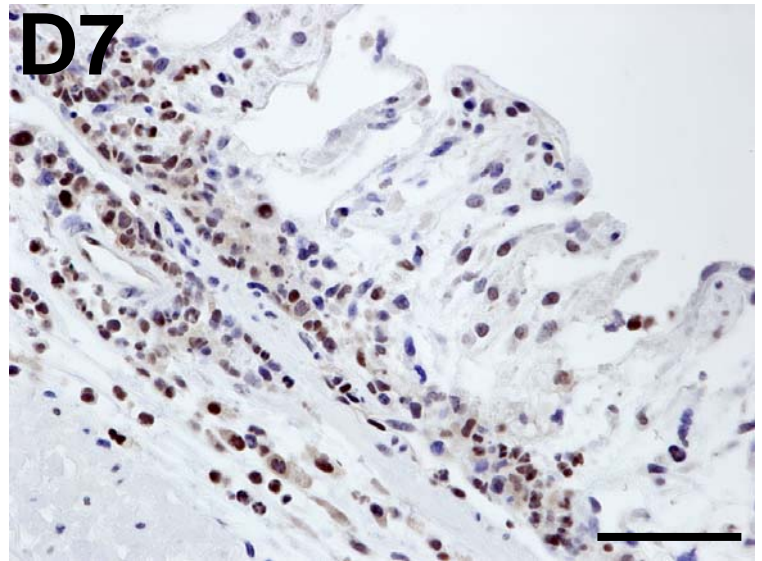

# Suppl. Fig 3

←  $pp65^{276}$  →

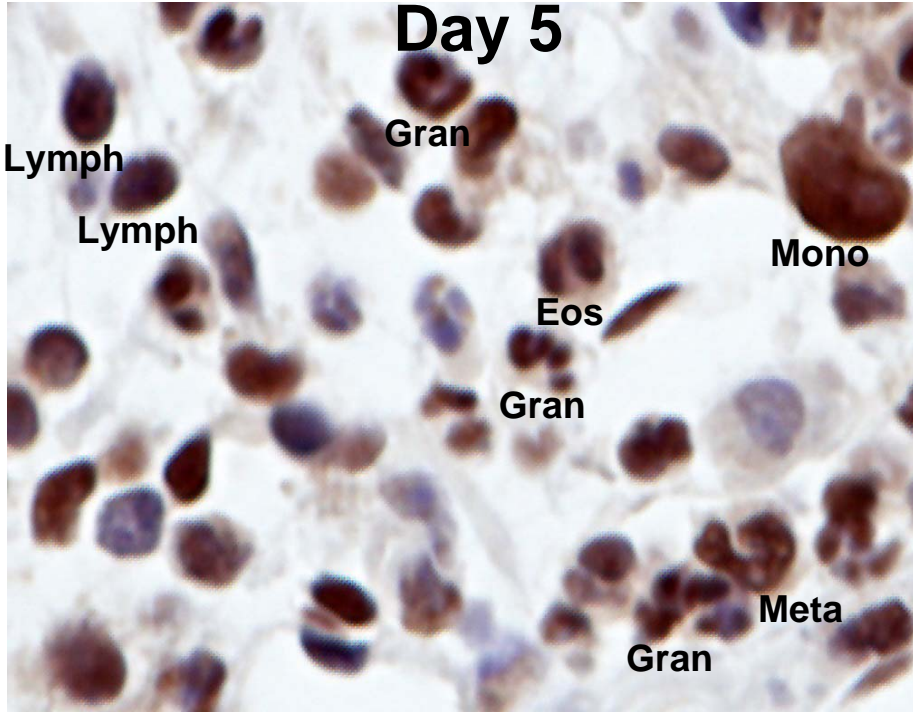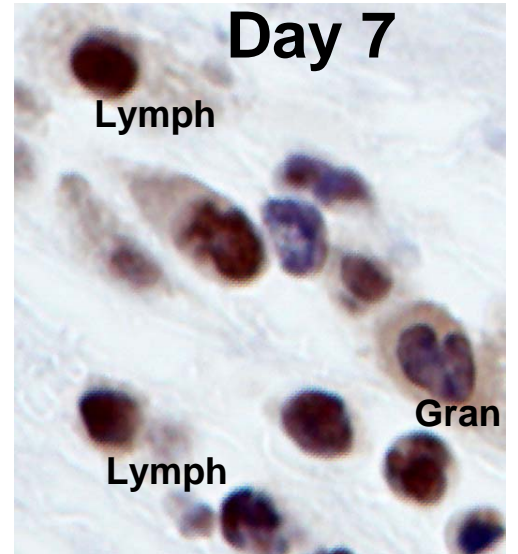



(A)

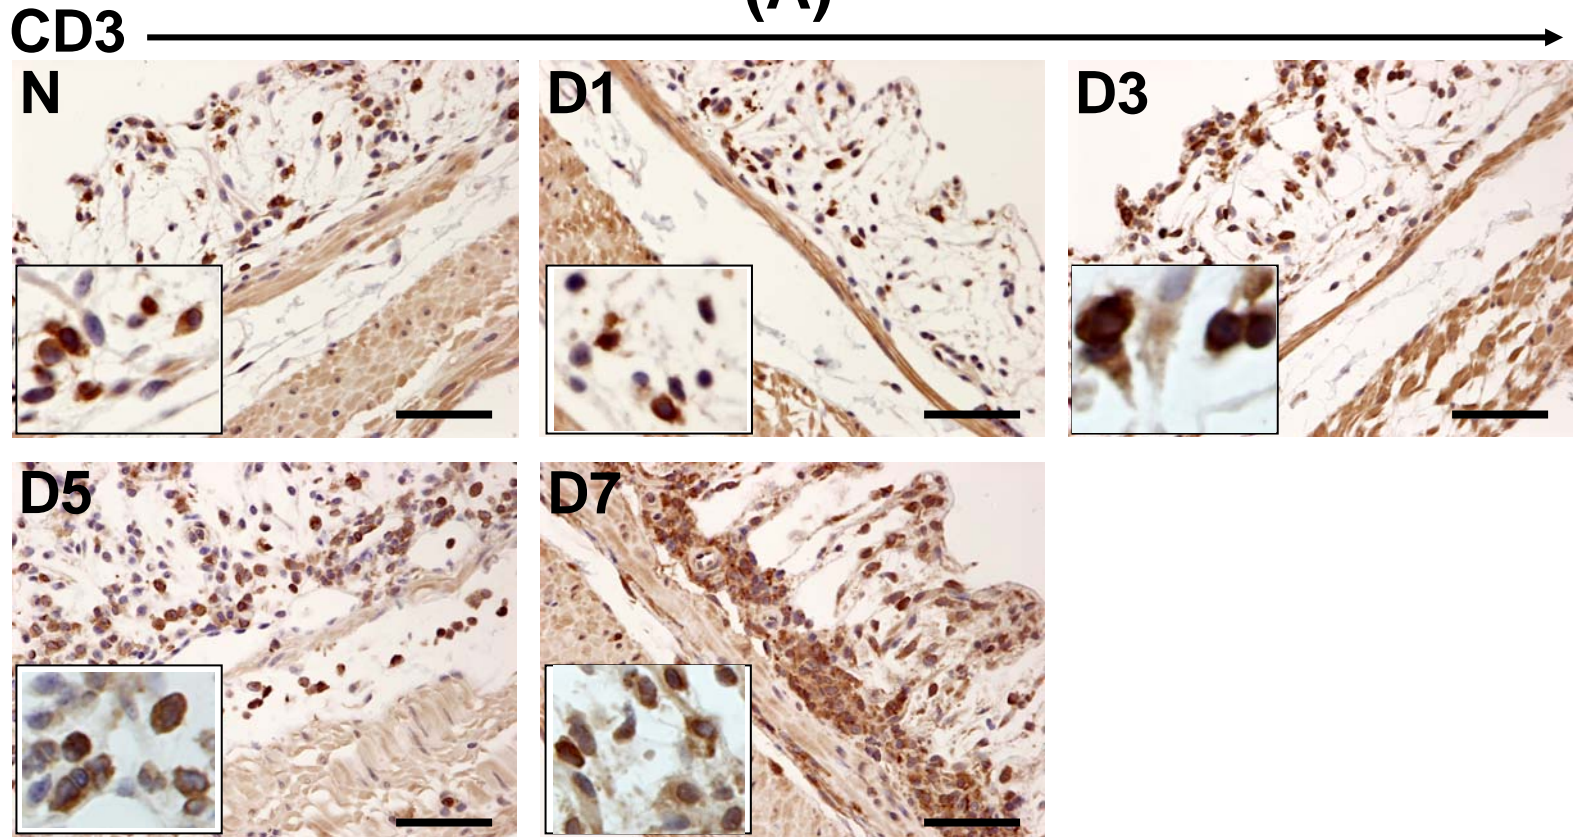

(B)

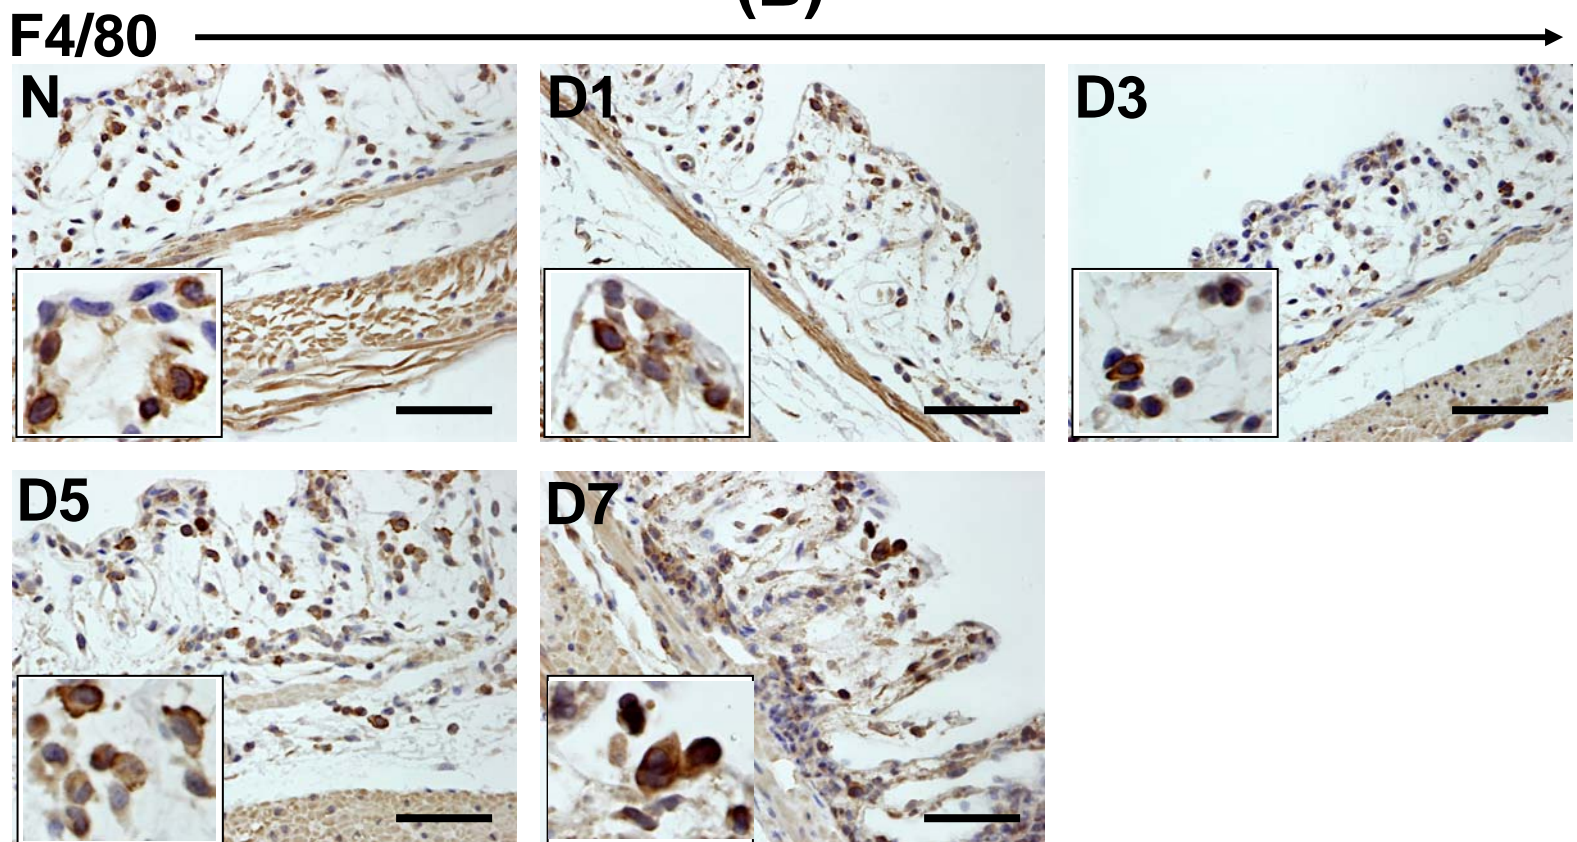



# Suppl. Fig 5

CD3

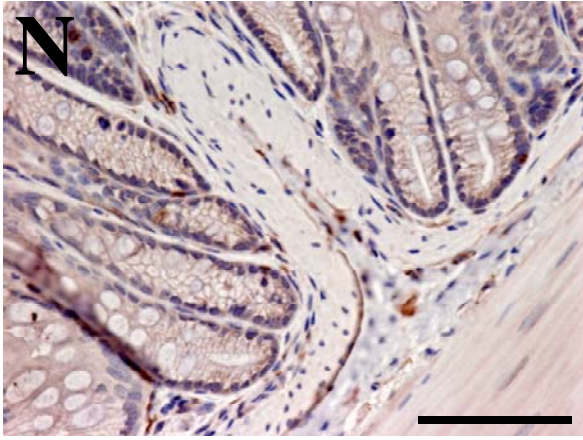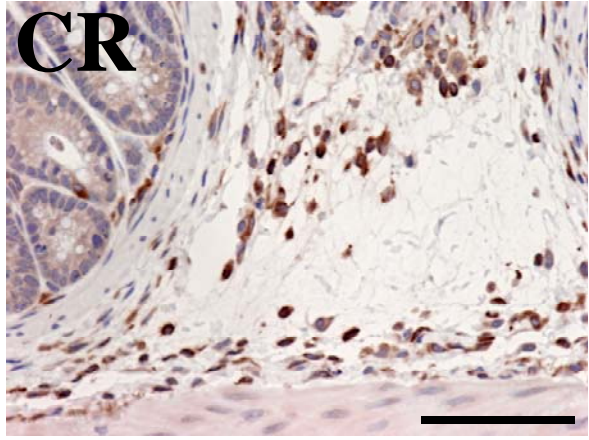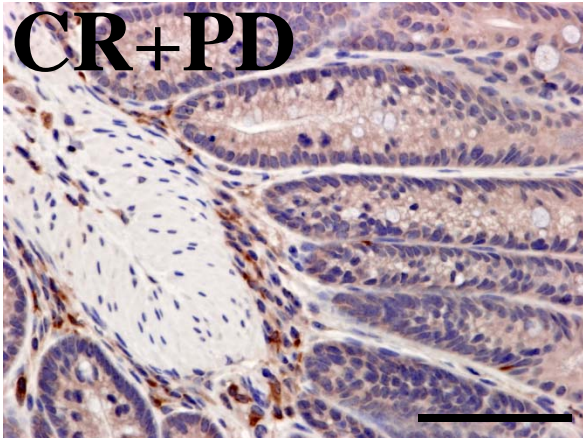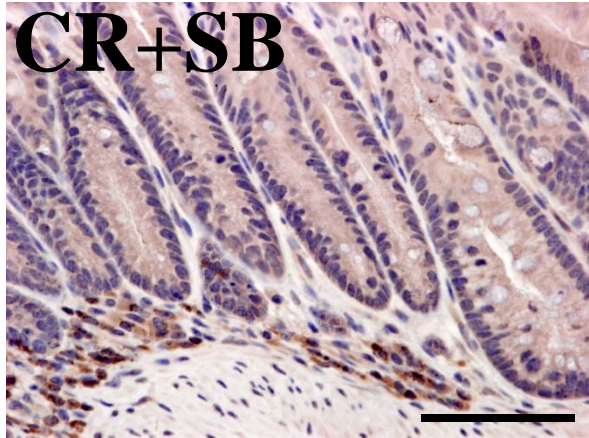

F4/80

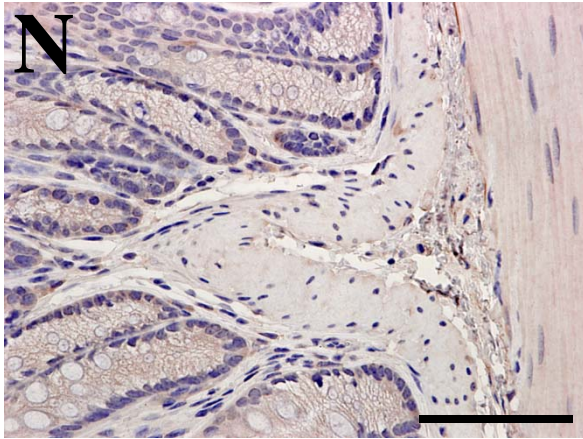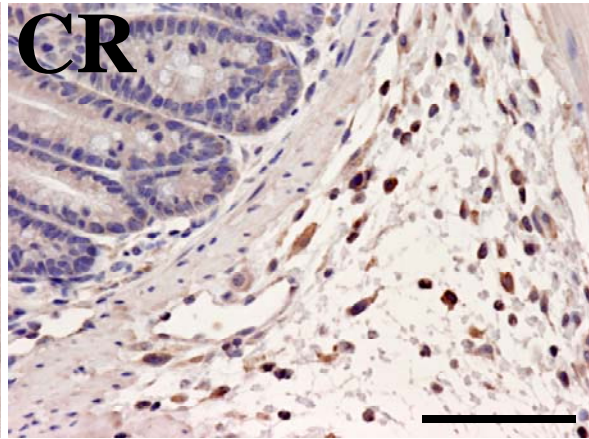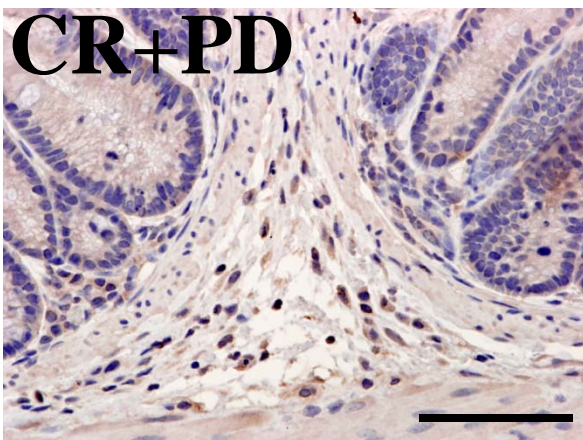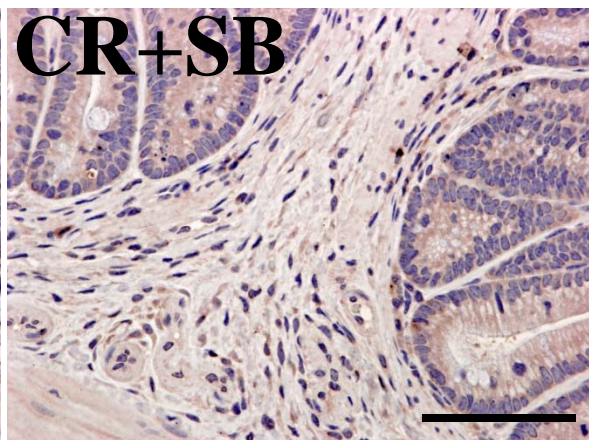







**A)****Suppl. Figure 7**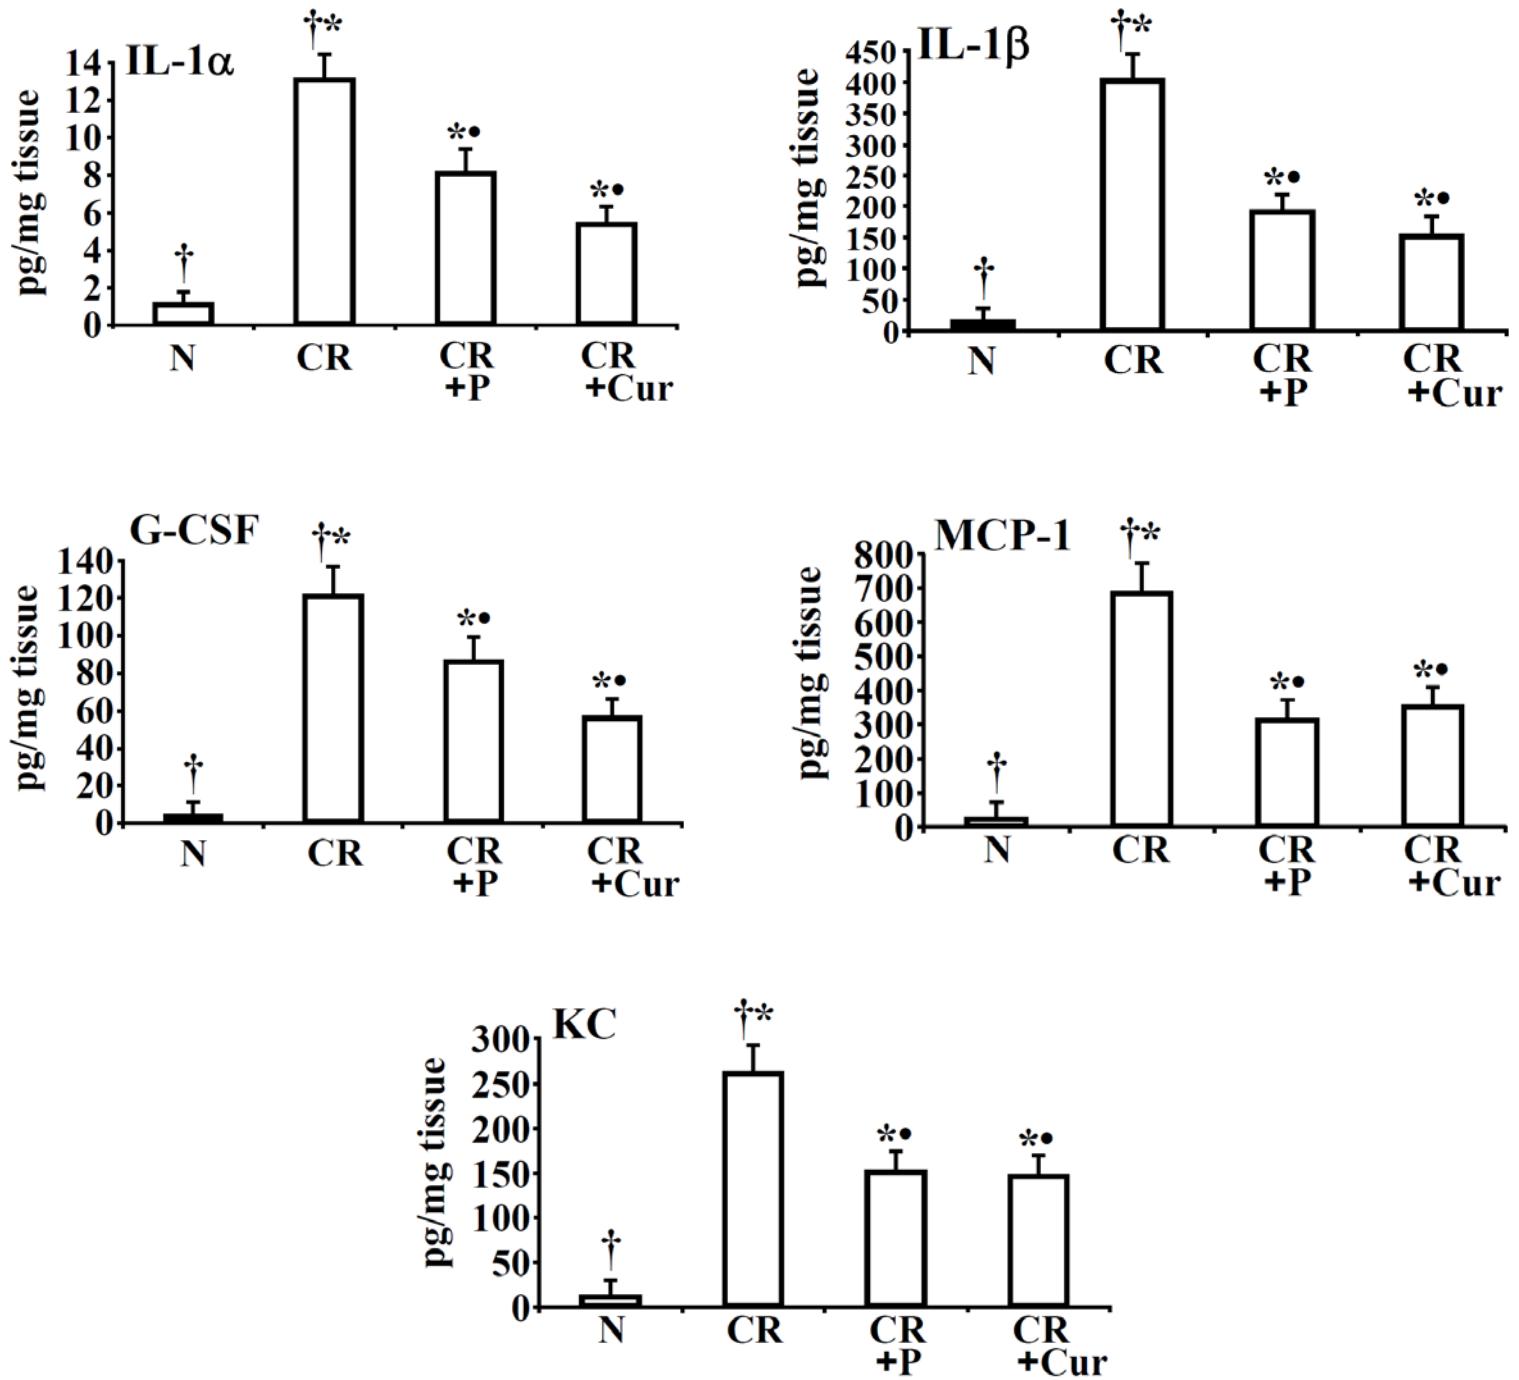**B)**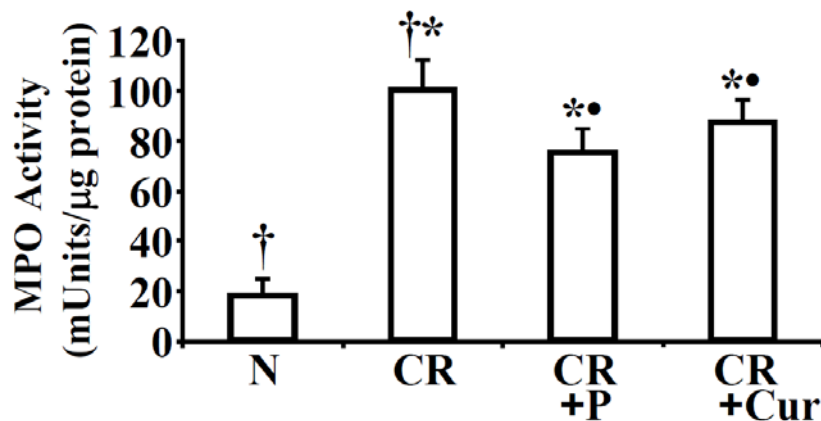

# Suppl. Figure 8

**A)**

*LPS*

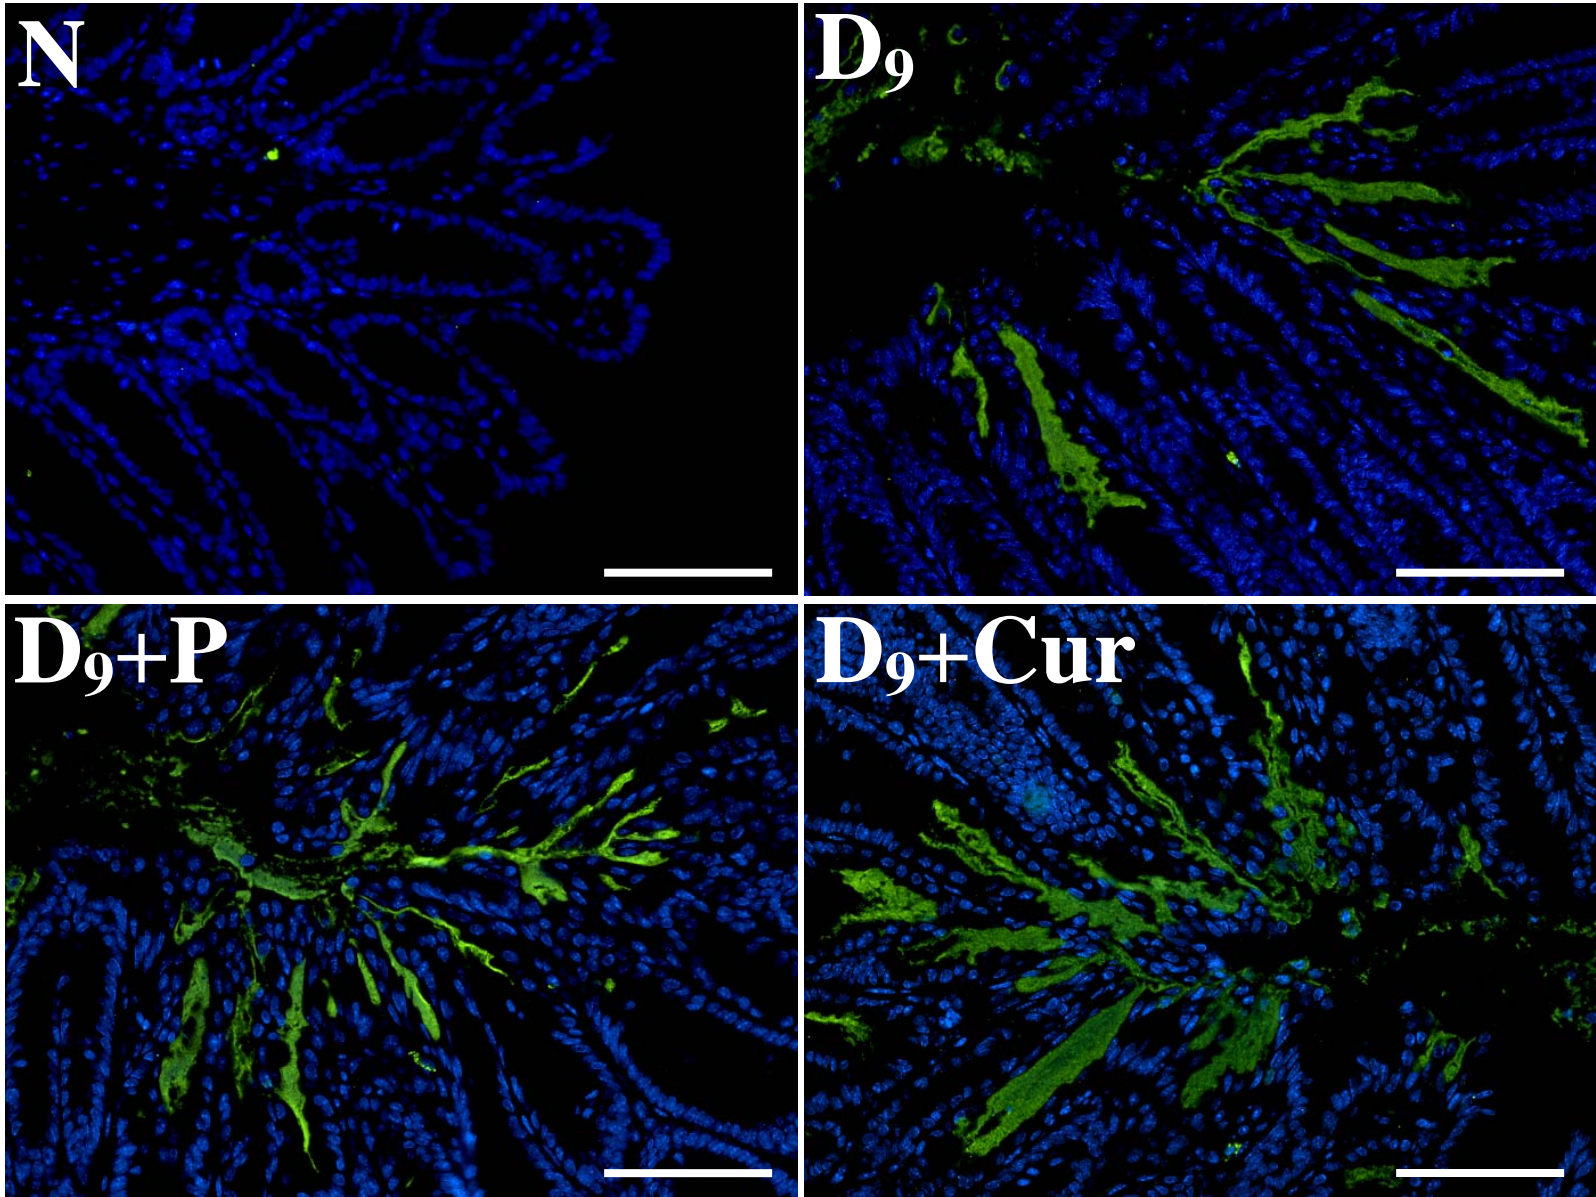

**B)**

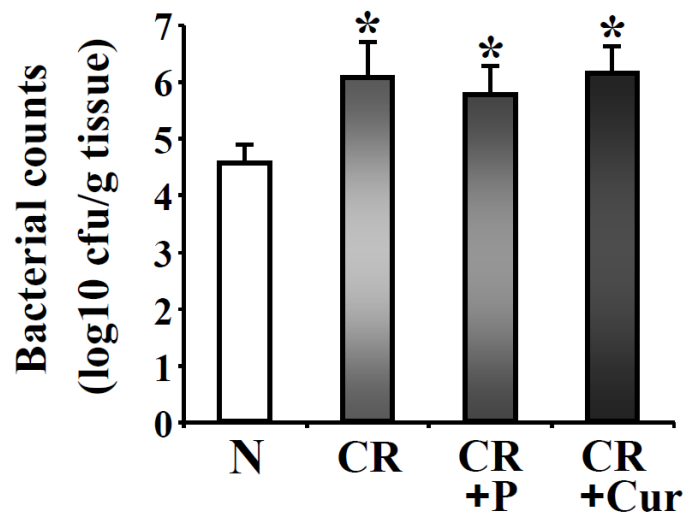



1 **SUPPLEMENTARY FIGURE LEGENDS**

2 **Supplementary Figure 1.** Immunohistochemistry either in the absence of primary  
3 antibody (upper panel) or with rabbit-IgG (lower panel) did not reveal any specific  
4 staining (Bar = 100µm; n = 3 independent experiment).

5

6 **Supplementary Figure 2. Kinetics of p65 subunit phosphorylated at Ser-276 in the**  
7 **crypt denuded *lamina propria*.** Paraffin embedded sections prepared from the crypt-  
8 denuded *lamina propria* of uninfected normal (N) and days 1-7 post-infected mice were  
9 stained with antibody for p65 phosphorylated at Ser-276 ( $pp65^{276}$ ) and analyzed with  
10 light microscopy. Magnification = 400x; n = 3 independent experiments).

11

12 **Supplementary Figure 3. Lymphocytes, monocytes and mononuclear cells stain**  
13 **positive for p65 subunit phosphorylated at Ser-276 ( $pp65^{276}$ ).** Crypt-denuded *lamina*  
14 *propria* of uninfected normal (N) and days 1-7 post-infected C3H mice were collected  
15 and processed for paraffin embedding and sections were stained with antibody for p65  
16 phosphorylated at Ser-276 and were analyzed with light microscopy. Please note  
17 significant staining for  $pp65^{276}$  in lymphocytes and monocytes/macrophages (Eos,  
18 eosinophils; Gran, granulocytes; Lymph, lymphocytes; Meta, metamyelocytes; Mono,  
19 monocytes; Magnification = 400x; n = 3 independent experiments).

20

21 **Supplementary Figure 4. Confirmation of increases in CD3+ve T-cells and F4/80+ve**  
22 **macrophages in the crypt-denuded lamina propria during TMCH.** Crypt-denuded  
23 *lamina propria* of uninfected normal (N) and days 1-7 post-infected C3H mice were



24 collected and processed for paraffin embedding and sections were stained with antibodies  
25 for CD3 (**A**) and F4/80 (**B**) to label T-cells and macrophages, respectively. Sections were  
26 analyzed with light microscopy. Insets in **A** and **B** demonstrate presence of these cells in  
27 areas denuded for crypts. Magnification = 100x, insets, 400x; n = 3 independent  
28 experiments).

29

30 **Supplementary Figure 5. Effect of p38 and p44/42 inhibitors on recruitment of T-**  
31 **cells and macrophages.** Representative photomicrographs of paraffin embedded sections  
32 stained with antibodies to CD3 and F4/80 to detect T-cells and macrophages,  
33 respectively. N, uninfected normal; CR, CR-infected; CR+PD or CR+SB, CR-infected  
34 and treated with specific ERK1/2 and p38 inhibitors. (Scale bar = 50 $\mu$ m; n = 3  
35 independent experiments).

36

37 **Supplementary Figure 6. Anti-inflammatory properties of dietary pectin and**  
38 **curcumin. A and B.** Paraffin embedded sections prepared from the distal colons of  
39 uninfected normal (N), CR infected (day 9, D9) and CR infected (D9) + treated with 6%  
40 pectin or 4% curcumin diets were stained with antibodies for CD3 (**A**) and F4/80 (**B**) to  
41 label T-cells and macrophages, respectively. Staining was analyzed with light  
42 microscopy. Scale bar = 75 $\mu$ m (**A**) and 50 $\mu$ m (**B**); n = 3). **C. Measurement of histology**  
43 **score.** H&E stained sections from the above group of animals were subjected to  
44 measurement of inflammation and/or colitis score by an observer blinded to the treatment  
45 groups according to the morphological criteria described in Materials and Methods.

46 †\*P<0.05 vs. control (†); \*♥P<0.05 vs. D9 (†\*); n = 3 independent experiments.



47

48 **Supplementary Figure 7. Both pectin and curcumin diets exhibit significant anti-**  
49 **inflammatory properties *in vivo*.** A. Expression of pro-inflammatory cytokines and  
50 chemokines in the distal colonic homogenates of uninfected normal (N) and CR infected  
51 and CR infected + treated with 6% pectin or 4% curcumin mice were measured using  
52 Bio-Plex Cytokine assay Kit as described by the manufacturer. Samples were analyzed  
53 on a Bio-Rad 96 well plate reader using the Bio-Plex Array system and Bio-Plex  
54 Manager software. Each bar represents mean±SD. [†\*, p<0.05 vs. control (†); \*●, p<0.05  
55 vs. CR (†\*); n = 3 independent experiments]. **B. Effect of dietary intervention on**  
56 **myeloperoxidase (MPO) activity.** MPO activity was measured in the colonic  
57 homogenates of uninfected normal (N) and CR infected and CR infected + treated with  
58 6% pectin or 4% curcumin mice using Fluoro MPO detection kit (Cell Tech. Inc. CA,  
59 USA) as was instructed in the manufacturer's protocol. Each bar represents mean±SD.  
60 [†\*, p<0.05 vs. control (†); \*●, p<0.05 vs. CR (†\*); n = 3 independent experiments].

61

62 **Supplementary Figure 8. LPS staining to detect CR.** A. Immunofluorescence  
63 detection of LPS as a surrogate for *Citrobacter* presence in the distal colon isolated from  
64 uninfected normal (N) or CR-infected (D9) or pectin (D9+P) and curcumin (D9+Cur)-  
65 treated animals. Paraffin-embedded sections were deparaffinized, subjected to antigen  
66 retrieval and incubated overnight at 4°C with anti-LPS antibody. Following incubation  
67 with secondary antibody conjugated with fluorescein isothiocyanate (FITC), slides were  
68 analyzed by fluorescent microscopy using Axiophot 2 microscope [Carl Zeiss, Germany;  
69 Bar = 125µm; n = 5 independent experiments. Green staining represents bacterial



70 presence. **B. Bacterial counts.** Neither pectin nor curcumin diet had any effect on  
71 bacterial counts (n = 5 independent experiments).

72
